# Supplementary material
Source: publisher figshare collection journal article supplement (https://geolsoc.figshare.com/ndownloader/files/5422391)
Supplement: Supplementary file 1 [file 5422391]

	Table A3. Heavy-mineral assemblages in the studied modern-sand samples from the Lepontine Dome and Southern Alps crustal section
	Sample	River	Site	Operator	grain size (?m)	grain size (?)	HMC (weight%)	% transparent	% opaque	% turbid	TOTAL	HCI Index	MMI Index	Sillimanite Index	zircon	tourmaline	rutile	other Ti oxides	titanite	apatite	blue-green hornblende	green hornblende	green-brown hornblende	brown hornblende	other amphiboles	clinopyroxene	enstatite	hypersthene	olivine	spinel	epidote group	chloritoid	garnet	staurolite	andalusite	kyanite	sillimanite	TOTAL
	Lepontine Dome
550	S1210	Liro	Mese	S. Andò	675	0.6	6.0	76%	15%	8%	100%	8	30	n.d.	0	2	0	0	5	0	14	2	1	0	4	0	0	0	0	0	25	1	42	1	0	0	0	100.0
575	S 1894	Ticino	Biasca	S. Andò	233	2.1	8.4	88%	11%	1%	100%	3	53	n.d.	1	1	3	0	2	0	40	3	0	0	2	0	0	0	0	0	23	0	17	3	0	3	0	100.0
610	S1877	Isorno	Montecretese	S. Andò	268	1.9	13.4	96%	4%	0%	100%	6	58	n.d.	0	0	0	0	2	0	53	6	2	0	9	3	0	0	0	0	7	0	11	3	0	2	1	100.0
620	S1888	Rovana	Cevio	S. Andò	358	1.5	12.0	95%	4%	1%	100%	9	50	n.d.	1	0	0	0	4	0	35	4	3	0	16	4	0	0	0	0	17	0	11	2	0	2	0	100.0
630	S1890	Verzasca	Frasco	S. Andò	456	1.1	3.1	95%	5%	0%	100%	9	70	n.d.	1	0	0	0	2	0	54	8	5	0	12	0	0	0	0	0	3	0	12	0	0	1	1	100.0
650	S1896	Moleno	Moleno	S. Andò	445	1.2	11.8	95%	4%	1%	100%	17	63	n.d.	0	0	0	0	0	0	43	11	10	0	4	4	10	2	12	0	1	0	2	0	0	2	1	100.0
610	S1898	Calancasca	Grono	S. Andò	536	0.9	5.9	94%	6%	0%	100%	17	58	0	0	1	0	0	3	0	33	4	9	1	3	0	0	0	0	0	8	0	27	2	0	6	1	100.0
675	S1884	Boggia	Gordona	S. Andò	406	1.3	5.1	97%	3%	0%	100%	40	n.d.	n.d.	1	0	0	0	2	0	24	16	35	3	6	2	0	0	0	0	1	0	8	0	0	1	0	100.0
675	S1902	Marmontana	Roveredo	S. Andò	338	1.6	12.0	96%	3%	1%	100%	38	96	9	0	0	0	0	2	0	23	7	18	6	12	3	2	0	1	0	2	0	17	0	0	0	5	100.0
700	S1864	Schiesone	Prata Camportaccio	S. Andò	366	1.5	10.7	97%	3%	0%	100%	32	100	14	1	0	0	0	1	0	33	6	14	8	11	4	1	2	1	0	2	0	13	0	0	0	3	100.0
	Strona-Ceneri Zone
	S2616	right trib. Cannobino	Falmenta	S. Andò	675	0.6	1.8	92%	5%	3%	100%	6	52	n.d.	1	2	1	0	1	0	42	3	1	1	7	1	0	0	0	0	2	0	23	4	1	7	0	100.0
	Ivrea-Verbano kinzigites
	S2609	Bagnone	Prelo	S. Andò	776	0.4	12	91%	1%	8%	100%	19	100	0	0	1	1	0	5	0	15	7	2	1	9	8	1	1	1	1	22	0	9	0	0	0	15	100.0
	S2606	Crosa	Luzzogno	S. Andò	652	0.6	23	88%	1%	10%	100%	37	100	0	0	0	0	0	1	0	24	2	9	10	2	14	0	2	0	0	7	0	21	0	0	0	8	100.0
	S3286	Sambughetto	Sambughetto	S. Andò	500	1.0	12.42214228	90%	1%	9%	100%	33	98	0	0	0	2	1	2	1	14	17	14	0	5	5	0	0	0	0	6	1	5	0	0	0	30	100.0
	S3285	Ovasca	Ovasca	S. Andò	850.667161	0.2	26.95623627	97%	0%	3%	100%	30	100	25	0	0	0	0	5	0	24	8	15	2	2	10	0	0	0	0	4	0	22	0	0	0	9	100.0
	Ivrea-Verbano stronalites
	S2605	left trib. Strona	Forno	S. Andò	595	0.8	47	78%	1%	20%	100%	59	98	73	0	0	2	0	0	0	7	0	1	10	0	5	0	4	0	0	1	0	53	0	0	0	13	100.0
	S3281	Nagarone	Piana di Forno	S. Andò	821.6903146	0.3	46.49884315	95%	3%	2%	100%	87	100	100	0	0	1	0	0	0	1	0	3	14	2	23	1	5	0	0	9	0	37	0	0	0	2	100.0
	S3172	left trib. Strona	Piana di Forno	S. Andò	901	0.2	38	83%	2%	15%	100%	96	n.d.	n.d.	0	0	2	0	0	0	0	0	0	7	2	5	0	19	0	0	3	0	62	0	0	0	0	100.0
	Ivrea Mafic Complex
	S2301	Moro	Morca	S. Monguzzi	406	1.3	53	55%	15%	29%	100%	85	n.d.	n.d.	0	0	1	0	0	0	2	1	5	23	1	11	0	37	0	0	3	1	12	0	0	0	0	100.0
	S2944	Strona di Postua	Cravoso	S. Andò	524	0.9	47	74%	19%	7%	100%	85	n.d.	n.d.	0	0	0	0	0	0	1	1	1	13	2	8	0	55	0	0	3	0	15	0	0	0	0	100.0
